# Supplementary material
Source: publisher figshare collection journal article supplement (https://diabetesjournals.figshare.com/ndownloader/files/25880985)
Supplement: Supplementary file 1 [file 25880985]

Table S1: Sensitivity and Specificity

| <b>All participants (n=310)*</b> | <b>Disease (per reference standard)</b> |          |       |
|----------------------------------|-----------------------------------------|----------|-------|
| Autonomous AI result             | Negative                                | Positive | Total |
| Negative                         | 234                                     | 1        | 235   |
| Positive                         | 61                                      | 6        | 67    |
| Total                            | 295                                     | 7        | 302   |

  

| <b>Participants who met ADA screening criteria (n=149)**</b> | <b>Disease (per reference standard)</b> |          |       |
|--------------------------------------------------------------|-----------------------------------------|----------|-------|
| Autonomous AI result                                         | Negative                                | Positive | Total |
| Negative                                                     | 104                                     | 1        | 105   |
| Positive                                                     | 35                                      | 5        | 40    |
| Total                                                        | 139                                     | 6        | 145   |

\*Of the 310 total participants, 302 had gradable images that were included in this analysis.

\*\*Of the 149 participants that met ADA 2018 criteria for retinopathy screening, 145 had gradable images that were included in this analysis.

AI=artificial intelligence; ADA=American Diabetes Association
